# Supplementary material for: A parameterization of sub-grid topographical effects on solar radiation in the E3SM Land Model (version 1.0): implementation and evaluation over the Tibetan Plateau
Source: Copernicus journal article supplement (doi:10.5194/gmd-14-6273-2021), 2021-10-19
Supplement: Supplementary file 1 [file gmd-14-6273-2021-supplement.pdf]

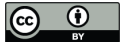

*Supplement of*

**A parameterization of sub-grid topographical effects on solar radiation in the E3SM Land Model (version 1.0): implementation and evaluation over the Tibetan Plateau**

**Dalei Hao et al.**

*Correspondence to:* Dalei Hao (dalei.hao@pnnl.gov)

The copyright of individual parts of the supplement might differ from the article licence.

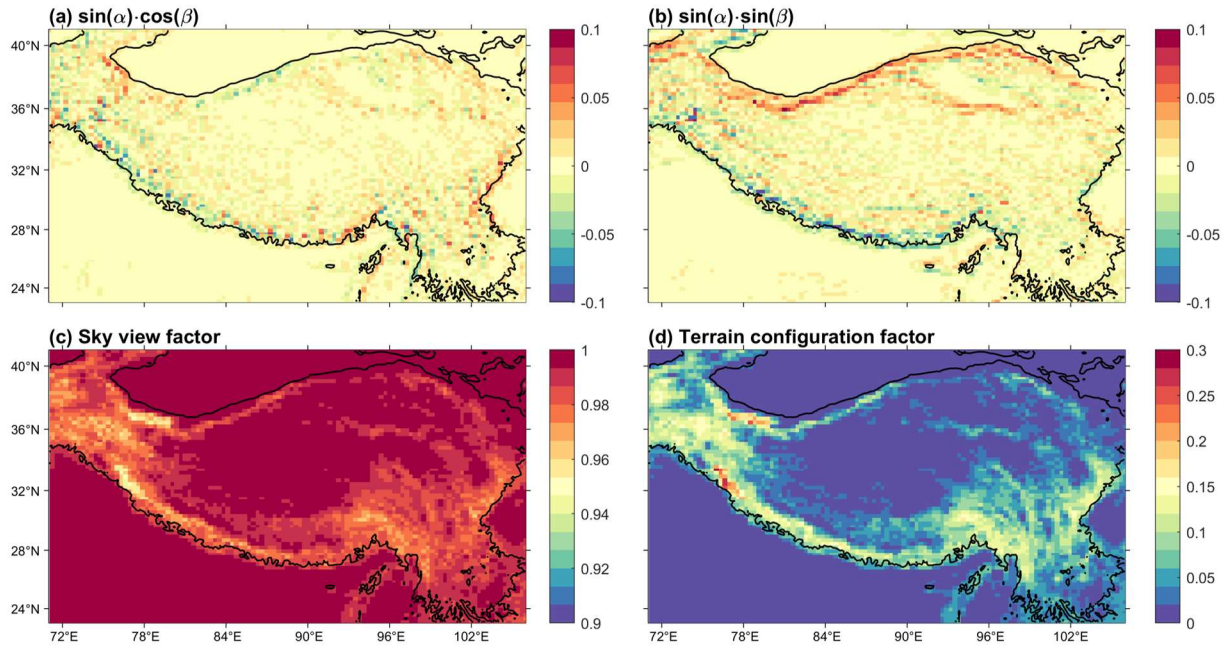

**Figure S1.** Spatial distributions of grid averaged values of  $\sin(\alpha) \cdot \cos(\beta)$  (a),  $\sin(\alpha) \cdot \sin(\beta)$  (b), sky view factor (c) and terrain configuration factor (d) derived from 90 m DEM at  $0.125^\circ \times 0.125^\circ$  spatial resolution over the TP.

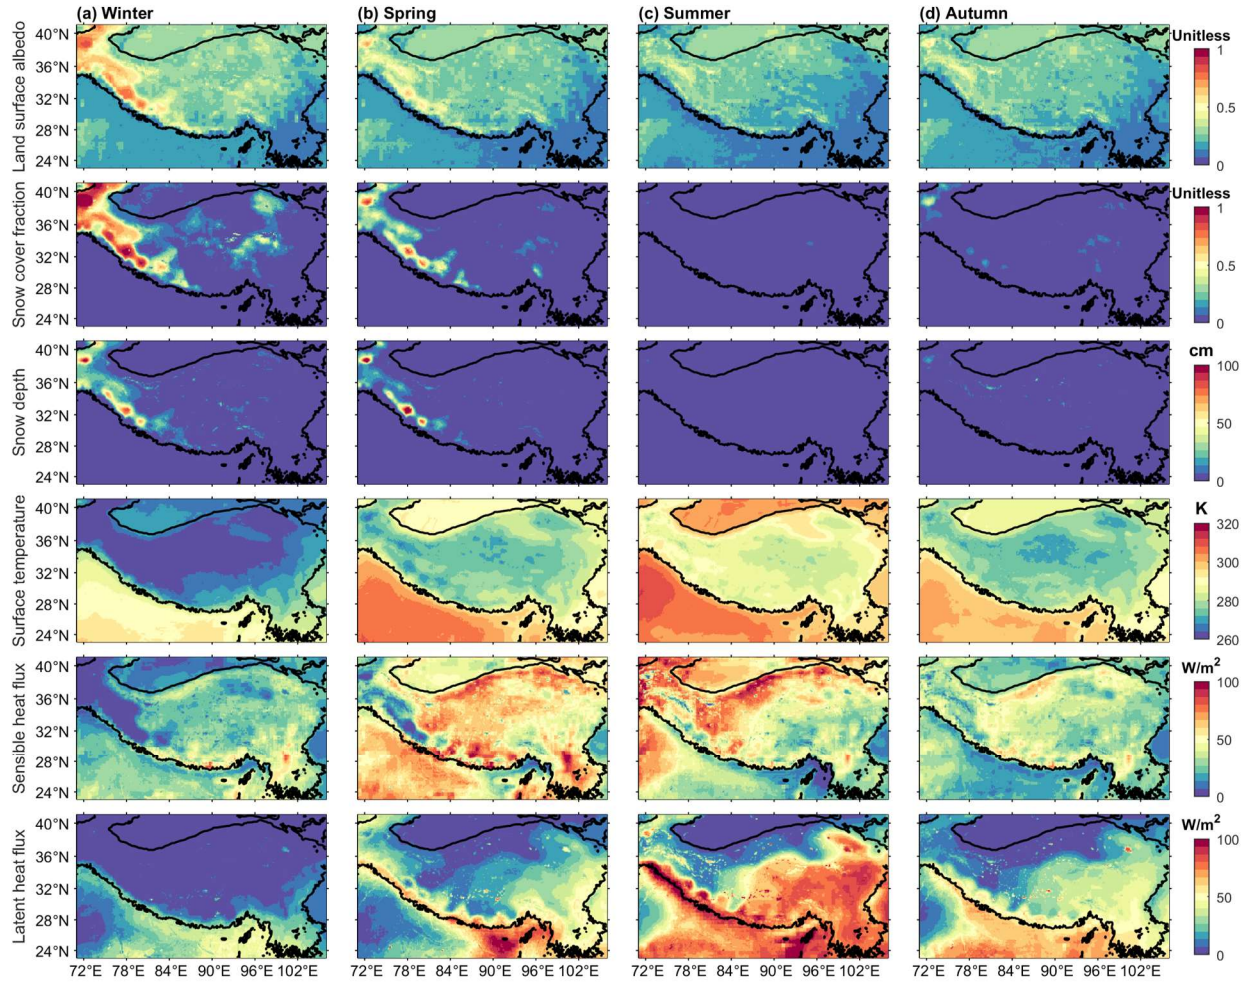

**Figure S2.** Spatial patterns of PP simulated variables (from top to bottom): land surface albedo, snow cover fraction, snow depth, surface temperature, sensible heat flux and latent heat flux, respectively for different seasons.

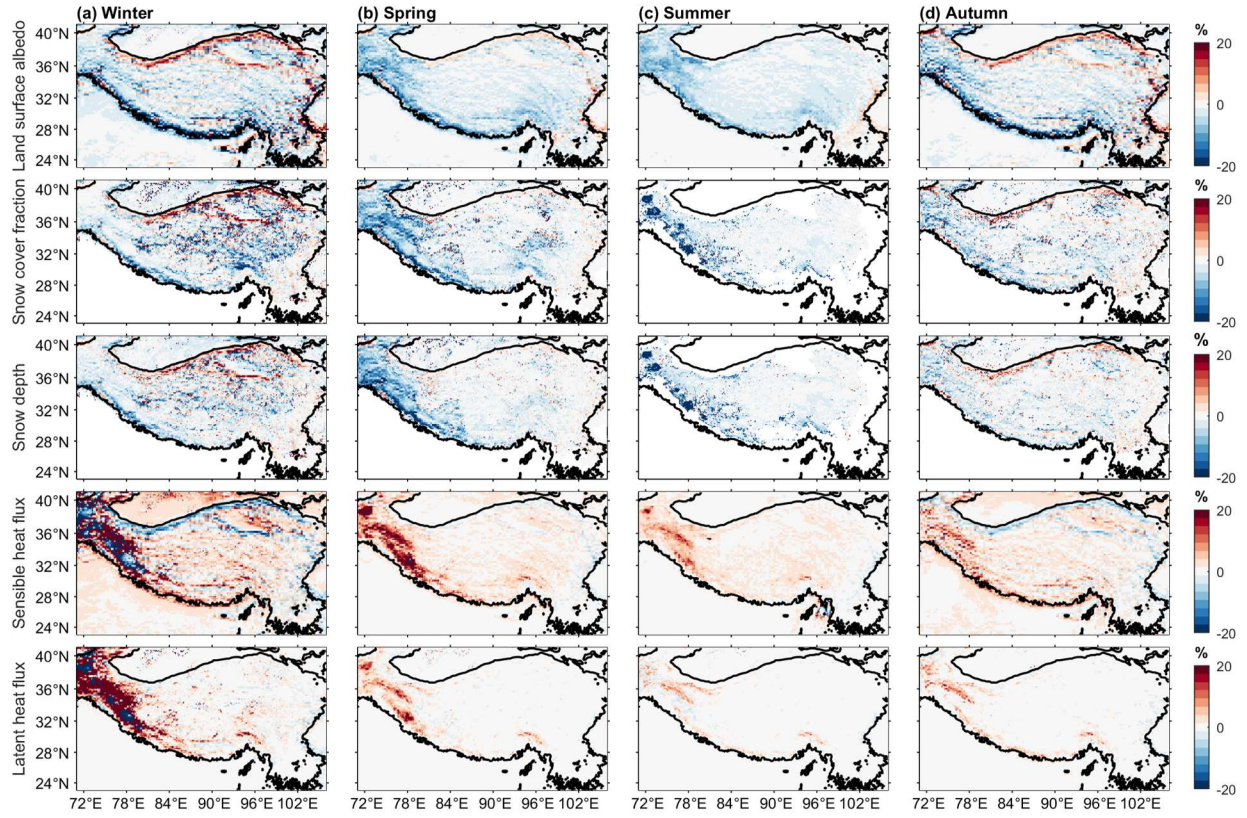

**Figure S3.** Relative differences between TOP and PP for different seasons in different variables (from top to bottom): land surface albedo, snow cover fraction, snow depth, sensible heat flux and latent heat flux.

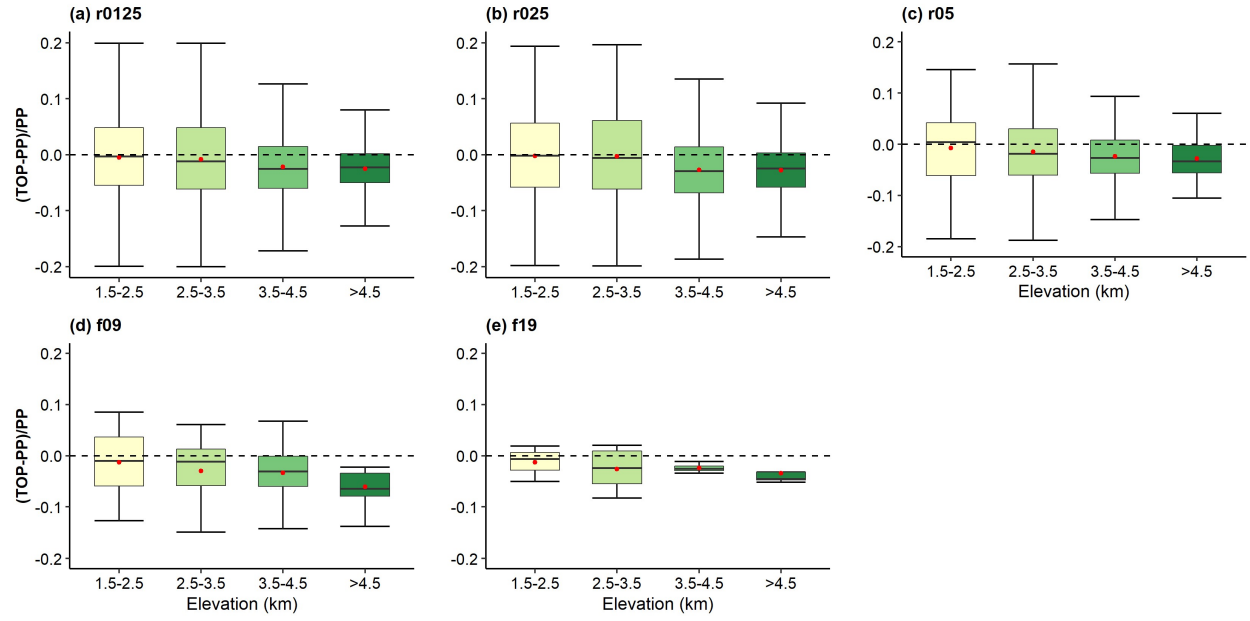

**Figure S4.** Boxplots of the relative differences in land surface albedo between TOP and PP in winter at different spatial scales and different elevation bands. Red points represent the mean values.

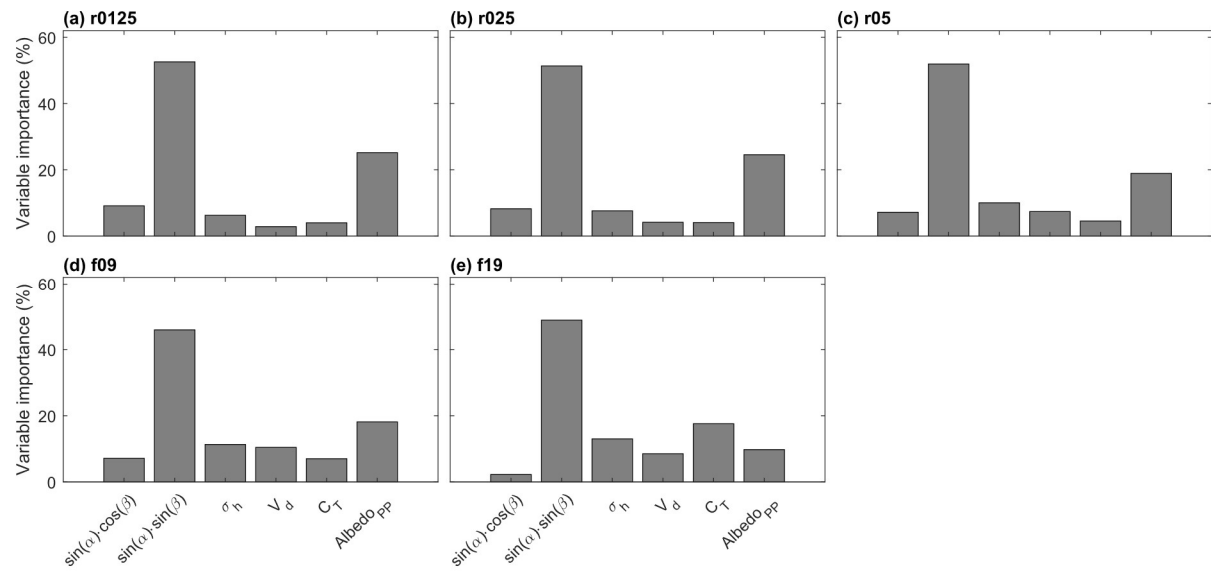

**Figure S5.** The relative contributions of different factors to the relative difference in land surface albedo between TOP and PP in winter at different spatial scales.

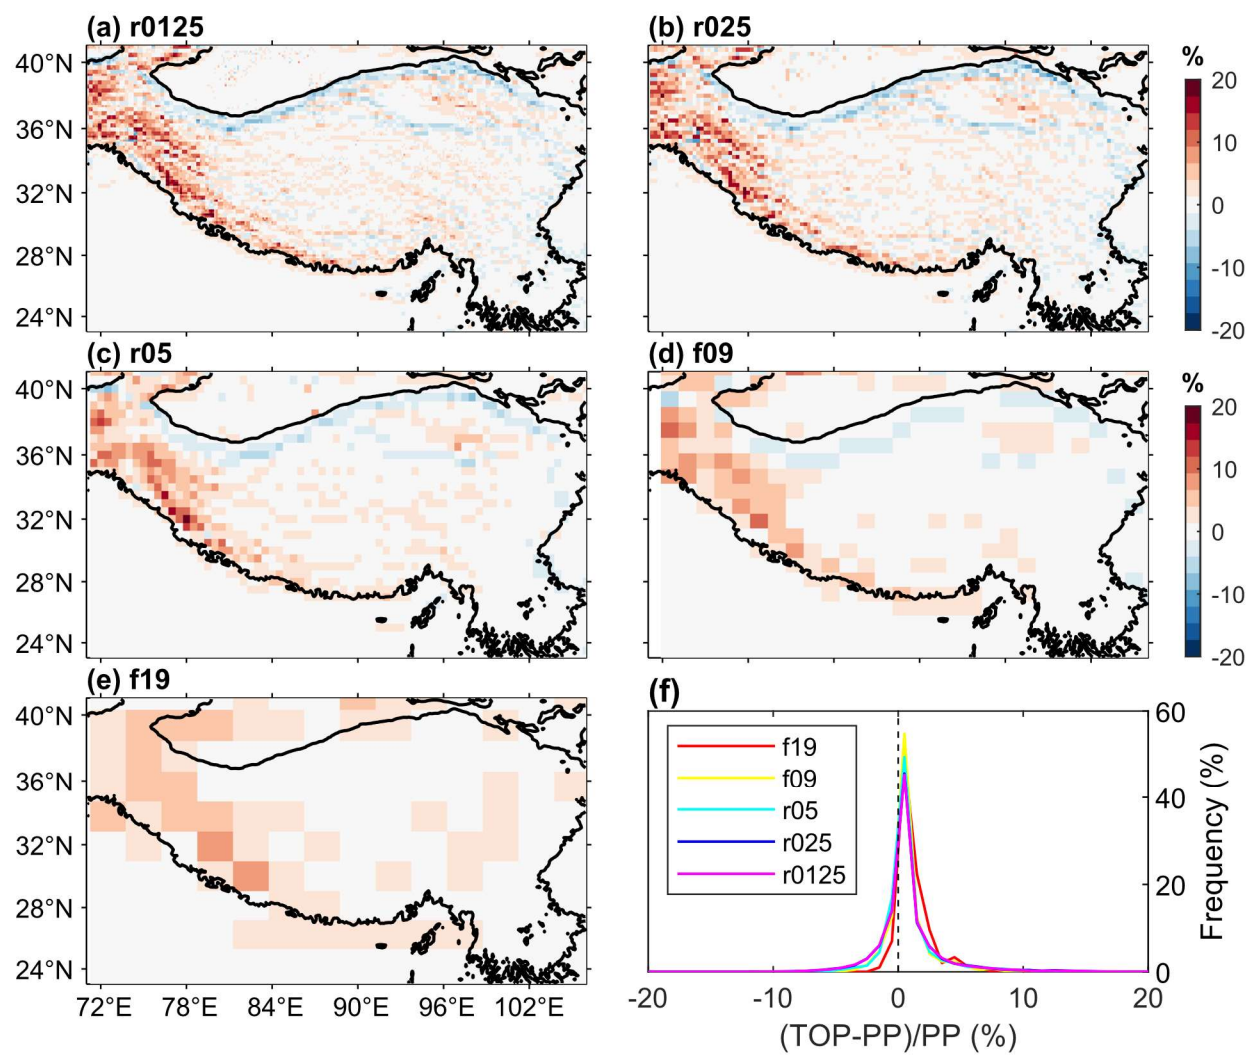

**Figure S6.** The relative differences in net solar radiation between TOP and PP in winter at different spatial scales (a-e) and the statistical histogram of their frequent distributions (f).

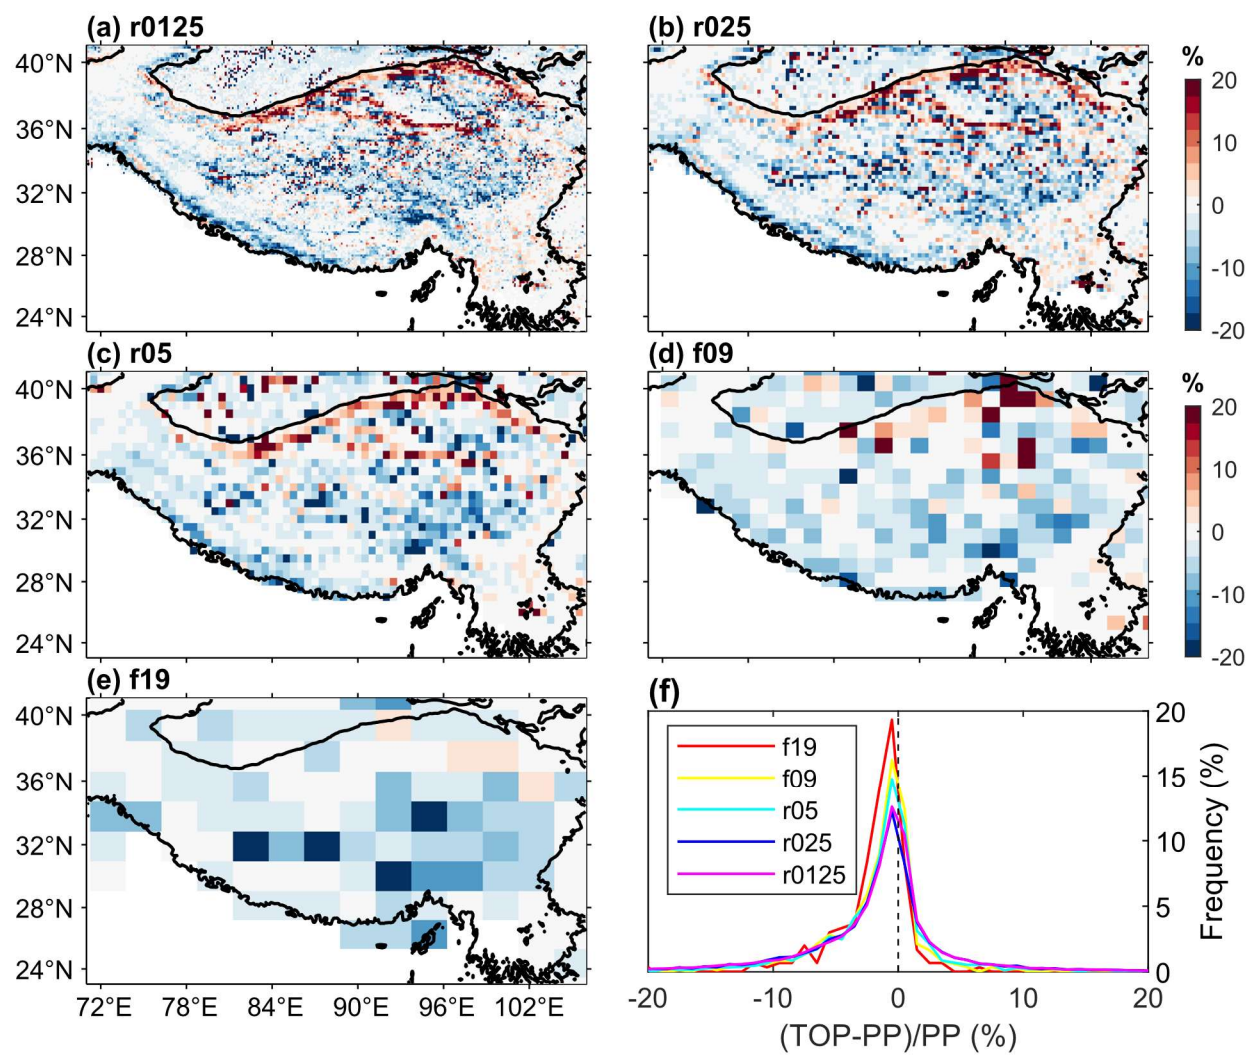

**Figure S7.** Same as Figure S6 except for snow cover fraction.

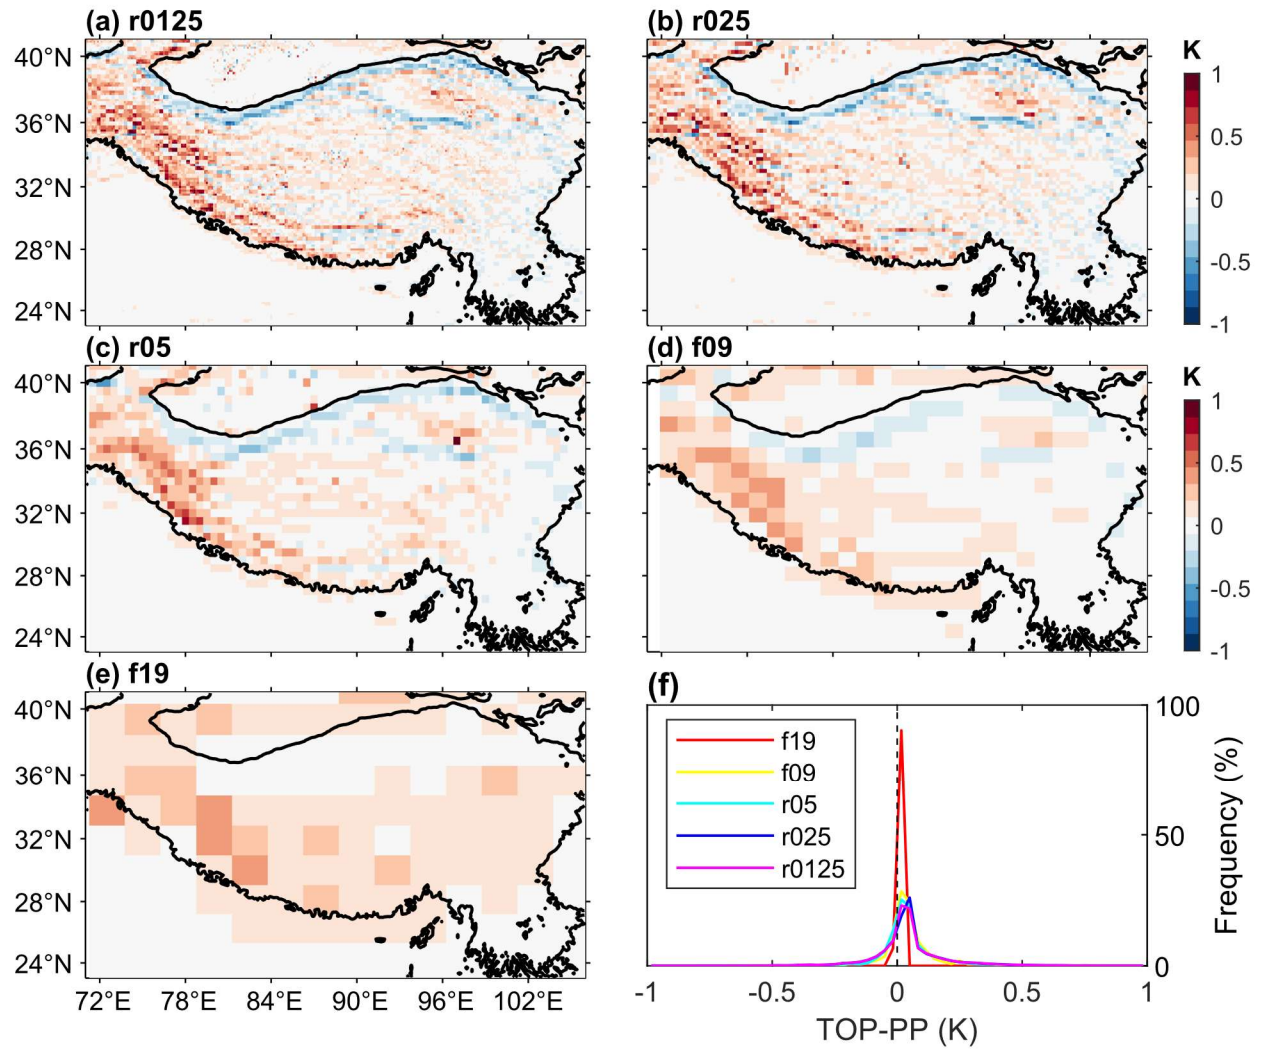

**Figure S8.** Same as Figure S6 except for the absolute differences of surface temperature.

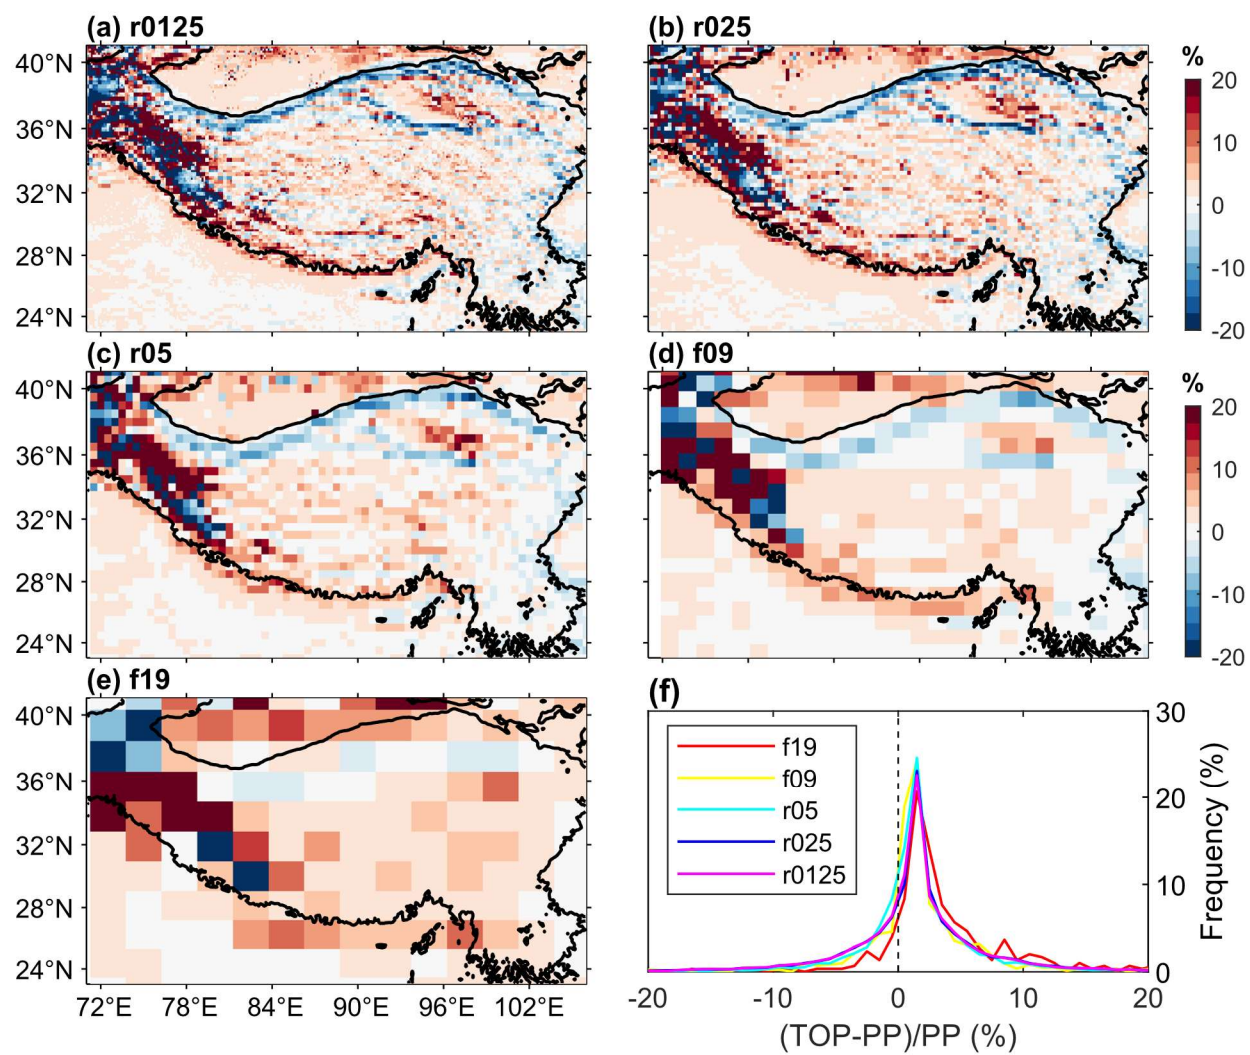

**Figure S9.** Same as Figure S6 except for sensible heat flux.

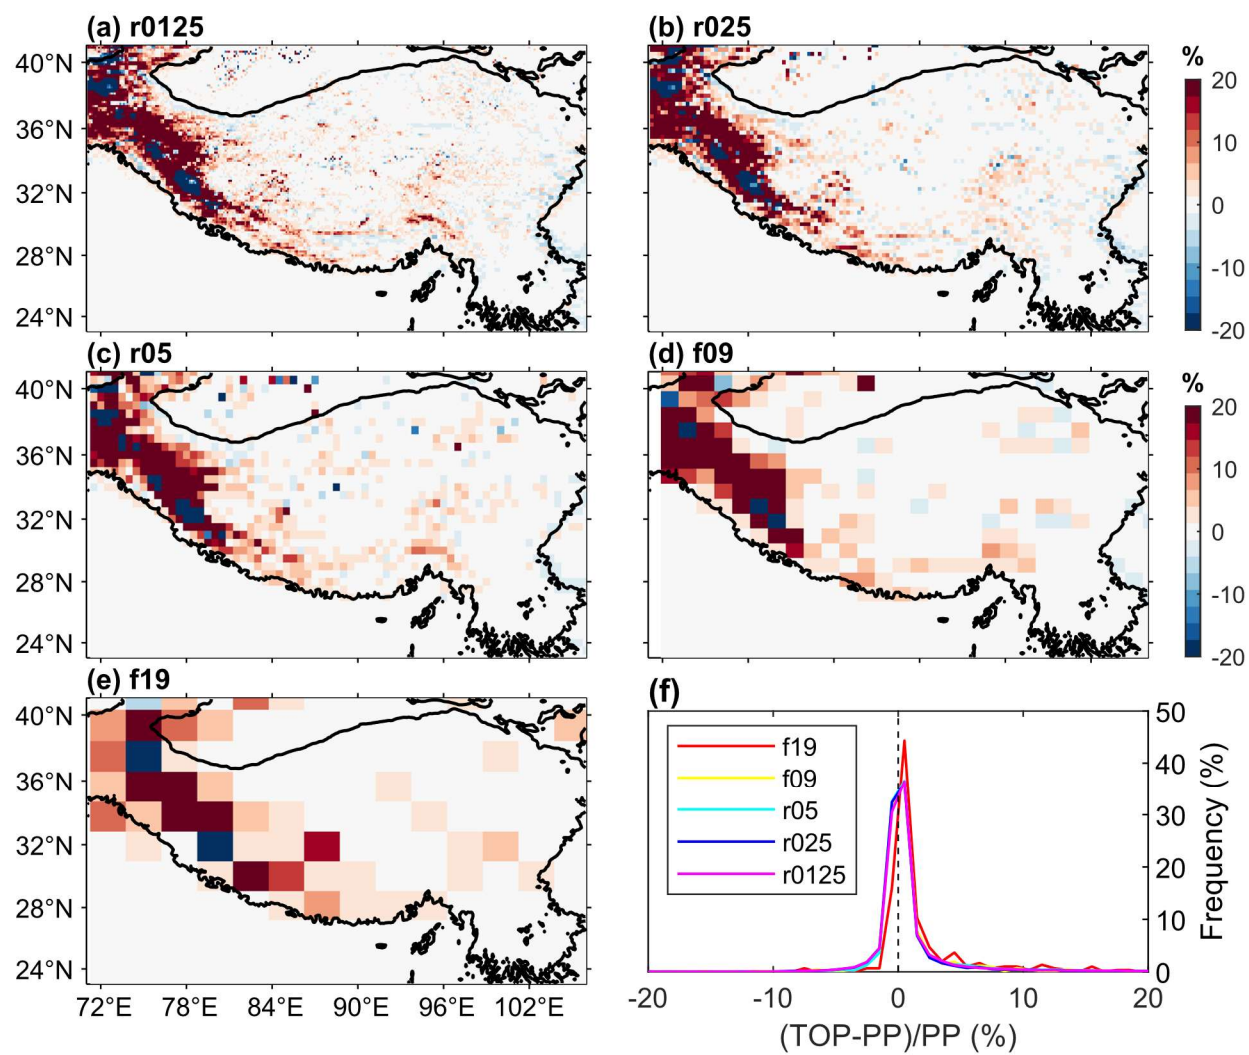

**Figure S10.** Same as Figure S6 except for latent heat flux.

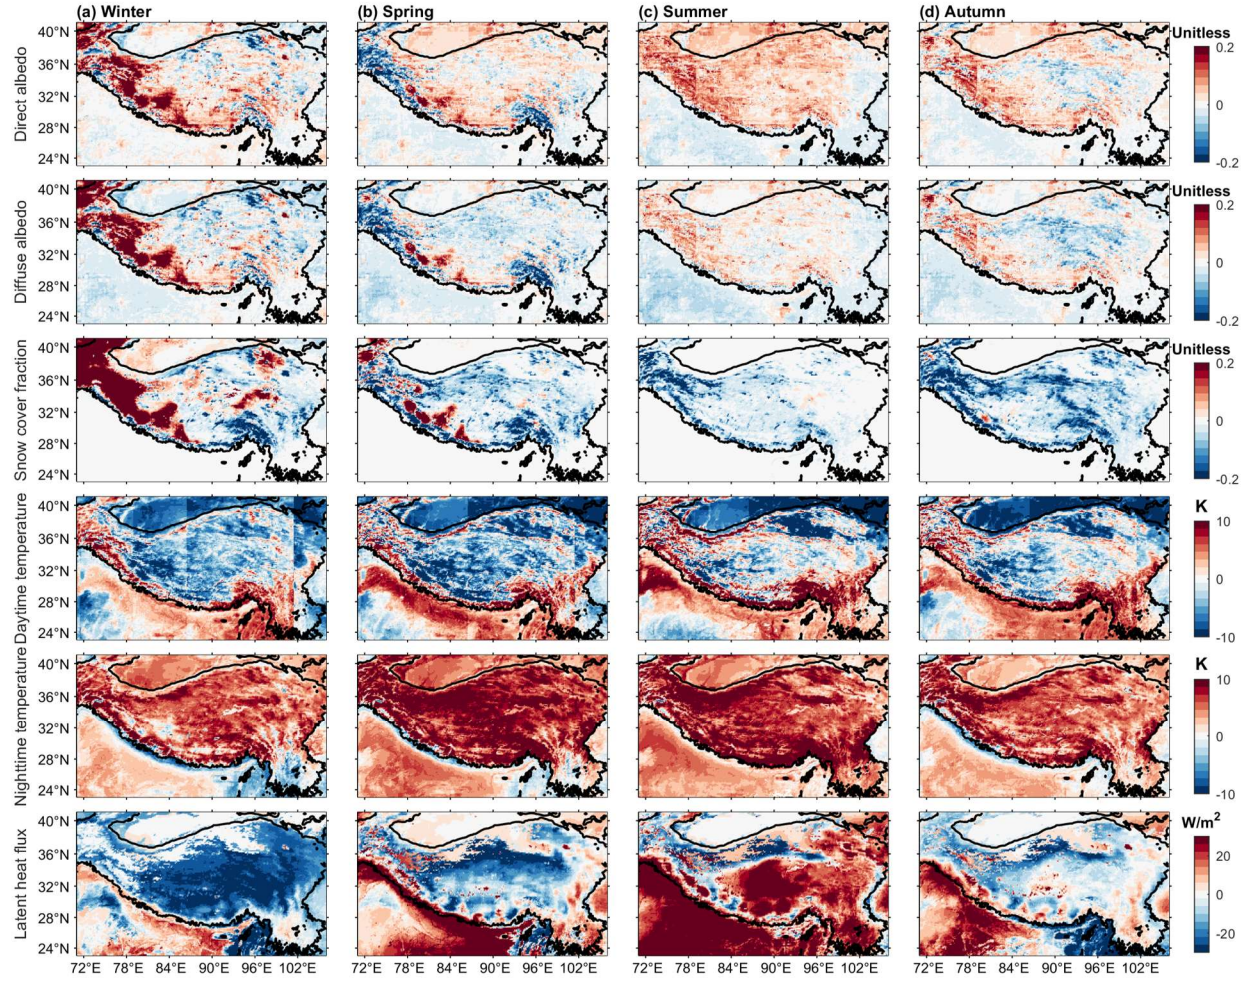

**Figure S11.** The bias of PP ( $|\delta_{PP}|$ ) with respect to MODIS data for four seasons in different variables (from top to bottom): direct albedo, diffuse albedo, snow cover fraction, daytime and nighttime surface temperature, and latent heat flux.

**Table S1.** Fitted parameters corresponding to different factors for direct and diffuse flux in equation 5, derived based on the 3D Monte Carlo simulations.

| SZA  | Direct flux            |            |                        |                  |                         | Diffuse flux           |                        |                     |                  |                      |
|------|------------------------|------------|------------------------|------------------|-------------------------|------------------------|------------------------|---------------------|------------------|----------------------|
|      | $\bar{\mu}$            | $\sigma_h$ | $\overline{V_d}$       | $\overline{C_T}$ | 1                       | $\bar{\mu}$            | $\sigma_h$             | $\overline{V_d}$    | $\overline{C_T}$ | 1                    |
| 0.1  | $6.792 \times 10^{-1}$ | 0          | $2.045 \times 10$      | 0                | $-2.103 \times 10$      | $2.456 \times 10^{-2}$ | $3.146 \times 10^{-7}$ | $4.385 \times 10^0$ | 0                | $-4.382 \times 10^0$ |
| 0.25 | $9.284 \times 10^{-1}$ | 0          | $1.993 \times 10^0$    | 0                | $-2.911 \times 10^0$    | $5.606 \times 10^{-2}$ | $6.001 \times 10^{-7}$ | $4.068 \times 10^0$ | 0                | $-4.085 \times 10^0$ |
| 0.4  | $9.863 \times 10^{-1}$ | 0          | $5.900 \times 10^{-2}$ | 0                | $-1.045 \times 10^{-0}$ | $1.049 \times 10^{-1}$ | $7.436 \times 10^{-7}$ | $3.911 \times 10^0$ | 0                | $-3.960 \times 10^0$ |
| 0.55 | $9.942 \times 10^{-1}$ | 0          | $5.270 \times 10^{-3}$ | 0                | $-9.995 \times 10^{-1}$ | $1.734 \times 10^{-1}$ | $7.806 \times 10^{-7}$ | $3.763 \times 10^0$ | 0                | $-3.863 \times 10^0$ |
| 0.70 | $9.959 \times 10^{-1}$ | 0          | $2.977 \times 10^{-3}$ | 0                | $-9.990 \times 10^{-1}$ | $2.543 \times 10^{-1}$ | $7.581 \times 10^{-7}$ | $3.559 \times 10^0$ | 0                | $-3.727 \times 10^0$ |
| 0.85 | $9.959 \times 10^{-1}$ | 0          | $2.977 \times 10^{-3}$ | 0                | $-9.990 \times 10^{-1}$ | 0                      | $7.015 \times 10^{-7}$ | $3.298 \times 10^0$ | 0                | $-3.547 \times 10^0$ |
| 1.00 | 0                      | 0          | $8.347 \times 10^{-3}$ | 0                | $-8.393 \times 10^{-3}$ | $2.456 \times 10^{-2}$ | $6.359 \times 10^{-7}$ | $2.984 \times 10^0$ | 0                | $-2.984 \times 10^0$ |

**Table S2.** Fitted parameters corresponding to different factors for direct-reflected and diffuse-reflected flux in equation 5, derived based on the 3D Monte Carlo simulations.

| SZA  | Direct-reflected flux |            |                         |                        |                         | Diffuse-reflected flux |            |                         |                        |                         |
|------|-----------------------|------------|-------------------------|------------------------|-------------------------|------------------------|------------|-------------------------|------------------------|-------------------------|
|      | $\bar{\mu}$           | $\sigma_h$ | $\overline{V_d}$        | $\overline{C_T}$       | 1                       | $\bar{\mu}$            | $\sigma_h$ | $\overline{V_d}$        | $\overline{C_T}$       | 1                       |
| 0.1  | 0                     | 0          | $2.351 \times 10^{-1}$  | $1.590 \times 10^{-1}$ | $-2.332 \times 10^{-1}$ | 0                      | 0          | $1.493 \times 10^{-1}$  | $1.621 \times 10^{-1}$ | $-1.483 \times 10^{-1}$ |
| 0.25 | 0                     | 0          | $1.368 \times 10^{-1}$  | $1.642 \times 10^{-1}$ | $-1.358 \times 10^{-1}$ | 0                      | 0          | $1.462 \times 10^{-1}$  | $1.654 \times 10^{-1}$ | $-1.454 \times 10^{-1}$ |
| 0.4  | 0                     | 0          | $1.254 \times 10^{-1}$  | $1.653 \times 10^{-1}$ | $-1.247 \times 10^{-1}$ | 0                      | 0          | $1.454 \times 10^{-1}$  | $1.673 \times 10^{-1}$ | $-1.446 \times 10^{-1}$ |
| 0.55 | 0                     | 0          | $1.274 \times 10^{-1}$  | $1.635 \times 10^{-1}$ | $-1.267 \times 10^{-1}$ | 0                      | 0          | $1.465 \times 10^{-1}$  | $1.683 \times 10^{-1}$ | $-1.457 \times 10^{-1}$ |
| 0.70 | 0                     | 0          | $1.314 \times 10^{-1}$  | $1.623 \times 10^{-1}$ | $-1.307 \times 10^{-1}$ | 0                      | 0          | $1.443 \times 10^{-1}$  | $1.682 \times 10^{-1}$ | $-1.435 \times 10^{-1}$ |
| 0.85 | 0                     | 0          | $1.359 \times 10^{-1}$  | $1.620 \times 10^{-1}$ | $-1.352 \times 10^{-1}$ | 0                      | 0          | $1.446 \times 10^{-1}$  | $1.686 \times 10^{-1}$ | $-1.439 \times 10^{-1}$ |
| 1.00 | 0                     | 0          | $-4.463 \times 10^{-6}$ | $1.556 \times 10^{-1}$ | $1.287 \times 10^{-3}$  | 0                      | 0          | $-3.427 \times 10^{-6}$ | $1.576 \times 10^{-1}$ | $1.199 \times 10^{-3}$  |
